# Supplementary material for: The prognostic significance of lymph nodes in patients with pT1c33N0M0 non-small cell lung cancer: a retrospective study
Source: PeerJ. 2024 Jan 31;12:e16866. doi: 10.7717/peerj.16866 (PMC10838084; doi:10.7717/peerj.16866)
Supplement: Supplemental Information 1 [file peerj-12-16866-s001.xls]

## Sheet: Sheet1
Num	Group	Gender	Age	Smoking history	Surgical site	Maximum tumor diameter	T-stage	Pathological type	Preoperative complications	Five-year survival	Survival time
1	11～16	female	≤60	yes	Left upper lung	＞3cm	T3	adenocarcinoma	no	no	50
2	＞16	male	>60	yes	Right middle lung	＞3cm	T2	Squamous carcinoma	no	no	52
3	0～10	male	>60	no	Right lower lung	≤3cm	T1c	adenocarcinoma	no	yes	67
4	11～16	male	>60	yes	Left upper lung	≤3cm	T1c	adenocarcinoma	no	no	50
5	11～16	male	≤60	no	Right upper lung	＞3cm	T1c	Squamous carcinoma	no	no	38
6	0～10	male	>60	no	Left upper lung	≤3cm	T1c	adenocarcinoma	no	yes	70
7	＞16	male	≤60	no	Left lower lung	＞3cm	T1c	adenocarcinoma	yes	yes	65
8	0～10	female	>60	yes	Right upper lung	＞3cm	T1c	Squamous carcinoma	no	no	45
9	0～10	male	≤60	no	Left upper lung	≤3cm	T1c	Squamous carcinoma	no	yes	73
10	11～16	female	>60	no	Left upper lung	≤3cm	T1c	other	no	yes	83
11	0～10	female	>60	no	Right upper lung	≤3cm	T1c	Squamous carcinoma	no	no	44
12	0～10	male	≤60	yes	Right lower lung	≤3cm	T1c	adenocarcinoma	no	yes	66
13	＞16	male	>60	no	Left upper lung	＞3cm	T3	Squamous carcinoma	no	no	39
14	0～10	male	≤60	no	Left upper lung	≤3cm	T1c	adenocarcinoma	yes	yes	75
15	11～16	male	>60	no	Left upper lung	≤3cm	T1c	Squamous carcinoma	no	no	57
16	11～16	male	>60	no	Right upper lung	≤3cm	T1c	Squamous carcinoma	no	yes	74
17	＞16	male	>60	no	Right upper lung	≤3cm	T2	Squamous carcinoma	yes	no	57
18	＞16	male	>60	no	Right upper lung	≤3cm	T1c	adenocarcinoma	no	yes	75
19	0～10	male	>60	yes	Left upper lung	＞3cm	T1c	adenocarcinoma	no	yes	72
20	＞16	female	>60	no	Right lower lung	≤3cm	T2	adenocarcinoma	no	yes	65
21	11～16	male	≤60	no	Left upper lung	≤3cm	T1c	other	no	no	44
22	＞16	male	≤60	no	Right lower lung	≤3cm	T1c	adenocarcinoma	no	yes	60
23	＞16	male	>60	no	Right lower lung	＞3cm	T2	other	no	no	50
24	11～16	male	>60	yes	Left lower lung	≤3cm	T2	adenocarcinoma	no	yes	74
25	＞16	male	>60	no	Right lower lung	≤3cm	T2	Squamous carcinoma	yes	yes	77
26	0～10	male	>60	no	Right lower lung	＞3cm	T2	adenocarcinoma	no	no	54
27	11～16	male	≤60	yes	Left upper lung	≤3cm	T1c	Squamous carcinoma	no	no	50
28	＞16	female	>60	yes	Left upper lung	≤3cm	T2	Squamous carcinoma	no	yes	69
29	11～16	male	≤60	no	Right upper lung	≤3cm	T1c	Squamous carcinoma	no	yes	66
30	11～16	male	>60	yes	Left upper lung	≤3cm	T2	adenocarcinoma	no	no	44
31	＞16	female	>60	yes	Right upper lung	＞3cm	T1c	Squamous carcinoma	no	yes	64
32	＞16	male	≤60	yes	Right lower lung	≤3cm	T2	Squamous carcinoma	no	yes	73
33	0～10	female	>60	no	Left upper lung	＞3cm	T1c	adenocarcinoma	no	no	51
34	＞16	male	≤60	no	Right middle lung	＞3cm	T2	Squamous carcinoma	no	no	51
35	11～16	female	≤60	no	Right middle lung	≤3cm	T2	other	no	yes	70
36	＞16	male	>60	no	Right lower lung	＞3cm	T2	adenocarcinoma	no	no	49
37	0～10	female	>60	no	Left upper lung	＞3cm	T2	adenocarcinoma	no	yes	69
38	＞16	male	>60	yes	Left upper lung	≤3cm	T1c	Squamous carcinoma	no	yes	69
39	＞16	male	>60	no	Right middle lung	＞3cm	T3	Squamous carcinoma	no	no	46
40	11～16	male	≤60	no	Right upper lung	＞3cm	T2	adenocarcinoma	no	yes	75
41	11～16	female	≤60	no	Left lower lung	≤3cm	T2	adenocarcinoma	no	yes	63
42	＞16	female	≤60	yes	Right middle lung	≤3cm	T2	Squamous carcinoma	no	yes	67
43	＞16	male	>60	yes	Left lower lung	≤3cm	T1c	adenocarcinoma	no	yes	72
44	＞16	male	>60	no	Left lower lung	＞3cm	T2	Squamous carcinoma	no	no	48
45	0～10	male	≤60	no	Left upper lung	≤3cm	T1c	Squamous carcinoma	no	yes	60
46	＞16	male	>60	no	Right upper lung	＞3cm	T2	Squamous carcinoma	yes	no	41
47	＞16	male	≤60	no	Left lower lung	≤3cm	T1c	Squamous carcinoma	no	yes	71
48	0～10	male	>60	yes	Right middle lung	≤3cm	T1c	Squamous carcinoma	yes	yes	63
49	＞16	male	>60	no	Left lower lung	≤3cm	T2	adenocarcinoma	no	no	55
50	11～16	female	>60	yes	Right middle lung	≤3cm	T1c	adenocarcinoma	no	yes	77
51	0～10	male	>60	yes	Right middle lung	＞3cm	T2	adenocarcinoma	no	no	55
52	＞16	male	>60	yes	Left upper lung	＞3cm	T2	adenocarcinoma	no	yes	82
53	0～10	male	>60	no	Right upper lung	≤3cm	T2	adenocarcinoma	yes	yes	69
54	＞16	female	>60	no	Left upper lung	≤3cm	T1c	adenocarcinoma	no	yes	76
55	0～10	male	>60	no	Left lower lung	＞3cm	T1c	adenocarcinoma	no	no	43
56	＞16	female	>60	no	Left upper lung	＞3cm	T2	adenocarcinoma	no	no	37
57	＞16	female	>60	no	Right upper lung	＞3cm	T2	Squamous carcinoma	no	no	46
58	0～10	male	>60	no	Right upper lung	≤3cm	T1c	adenocarcinoma	yes	no	51
59	11～16	male	≤60	no	Left lower lung	≤3cm	T1c	adenocarcinoma	yes	yes	77
60	11～16	female	>60	yes	Right lower lung	＞3cm	T1c	Squamous carcinoma	no	no	51
61	0～10	male	>60	no	Left upper lung	≤3cm	T3	adenocarcinoma	yes	no	35
62	＞16	male	≤60	no	Right upper lung	＞3cm	T1c	Squamous carcinoma	no	yes	69
63	＞16	male	>60	no	Right upper lung	≤3cm	T2	Squamous carcinoma	no	no	45
64	0～10	male	>60	no	Left lower lung	≤3cm	T1c	adenocarcinoma	no	yes	73
65	＞16	male	≤60	no	Right upper lung	＞3cm	T1c	adenocarcinoma	yes	yes	66
66	11～16	male	≤60	yes	Left upper lung	≤3cm	T1c	adenocarcinoma	no	no	42
67	11～16	male	>60	yes	Left lower lung	≤3cm	T1c	adenocarcinoma	no	yes	69
68	＞16	female	>60	no	Right middle lung	≤3cm	T1c	adenocarcinoma	no	yes	73
69	11～16	female	≤60	no	Left lower lung	≤3cm	T1c	other	no	yes	71
70	＞16	male	>60	no	Left upper lung	＞3cm	T1c	adenocarcinoma	no	yes	71
71	0～10	male	>60	yes	Right upper lung	＞3cm	T2	adenocarcinoma	no	no	41
72	0～10	female	>60	no	Left lower lung	≤3cm	T1c	adenocarcinoma	yes	no	58
73	＞16	female	>60	no	Left upper lung	≤3cm	T1c	Squamous carcinoma	no	yes	75
74	11～16	male	>60	no	Left upper lung	≤3cm	T2	Squamous carcinoma	no	yes	74
75	11～16	male	>60	no	Left upper lung	＞3cm	T1c	adenocarcinoma	no	no	48
76	＞16	male	>60	no	Left upper lung	≤3cm	T2	other	yes	yes	67
77	11～16	male	≤60	no	Left lower lung	≤3cm	T1c	adenocarcinoma	no	yes	68
78	＞16	female	>60	no	Left upper lung	＞3cm	T1c	adenocarcinoma	no	yes	70
79	11～16	male	>60	yes	Left upper lung	≤3cm	T1c	adenocarcinoma	yes	no	48
80	11～16	male	>60	no	Left upper lung	＞3cm	T2	adenocarcinoma	no	yes	70
81	11～16	male	>60	yes	Right upper lung	＞3cm	T2	adenocarcinoma	no	yes	76
82	11～16	male	>60	no	Left upper lung	≤3cm	T1c	adenocarcinoma	no	yes	76
83	＞16	male	≤60	no	Left lower lung	≤3cm	T1c	Squamous carcinoma	no	yes	66
84	＞16	male	>60	no	Left upper lung	≤3cm	T1c	Squamous carcinoma	no	yes	71
85	＞16	female	>60	yes	Left upper lung	≤3cm	T1c	Squamous carcinoma	yes	yes	71
86	＞16	female	>60	no	Right upper lung	≤3cm	T1c	adenocarcinoma	yes	yes	76
87	11～16	male	≤60	yes	Right upper lung	≤3cm	T1c	adenocarcinoma	no	no	38
88	11～16	male	>60	yes	Left lower lung	≤3cm	T2	adenocarcinoma	no	yes	67
89	11～16	male	>60	no	Left lower lung	≤3cm	T2	adenocarcinoma	no	yes	69
90	11～16	male	>60	no	Right upper lung	≤3cm	T1c	Squamous carcinoma	no	no	52
91	＞16	male	≤60	no	Left lower lung	＞3cm	T1c	adenocarcinoma	no	yes	66
92	11～16	male	≤60	no	Right lower lung	≤3cm	T1c	adenocarcinoma	no	no	54
93	＞16	female	>60	no	Left upper lung	＞3cm	T1c	adenocarcinoma	no	no	47
94	＞16	female	>60	no	Left lower lung	＞3cm	T3	adenocarcinoma	yes	no	39
95	＞16	male	≤60	yes	Right upper lung	＞3cm	T2	adenocarcinoma	yes	no	46
96	＞16	male	≤60	no	Left upper lung	＞3cm	T2	adenocarcinoma	no	no	40
97	＞16	male	>60	no	Left upper lung	≤3cm	T1c	other	no	yes	72
98	0～10	male	≤60	no	Left upper lung	≤3cm	T1c	adenocarcinoma	no	yes	75
99	11～16	male	>60	yes	Right middle lung	＞3cm	T1c	adenocarcinoma	no	yes	72
100	＞16	female	>60	no	Left lower lung	≤3cm	T2	Squamous carcinoma	no	yes	73
101	＞16	female	>60	no	Right upper lung	≤3cm	T2	adenocarcinoma	no	no	40
102	0～10	male	>60	no	Right upper lung	＞3cm	T1c	adenocarcinoma	no	no	59
103	11～16	female	>60	no	Right lower lung	≤3cm	T1c	adenocarcinoma	no	yes	73
104	＞16	male	>60	yes	Left upper lung	＞3cm	T2	Squamous carcinoma	no	no	44
105	＞16	female	≤60	no	Left upper lung	≤3cm	T1c	adenocarcinoma	yes	yes	69
106	0～10	male	>60	no	Left upper lung	≤3cm	T1c	adenocarcinoma	no	yes	80
107	＞16	male	>60	yes	Right upper lung	≤3cm	T1c	adenocarcinoma	no	yes	68
108	＞16	male	>60	no	Left lower lung	＞3cm	T2	adenocarcinoma	no	no	31
109	11～16	female	>60	no	Left lower lung	≤3cm	T1c	Squamous carcinoma	yes	yes	69
110	11～16	female	>60	yes	Left upper lung	≤3cm	T1c	adenocarcinoma	no	yes	78
111	＞16	female	>60	no	Left lower lung	≤3cm	T2	Squamous carcinoma	no	yes	64
112	0～10	male	>60	no	Right upper lung	≤3cm	T1c	Squamous carcinoma	no	yes	72
113	11～16	male	>60	no	Right middle lung	≤3cm	T2	adenocarcinoma	yes	yes	69
114	＞16	male	≤60	yes	Right middle lung	≤3cm	T2	adenocarcinoma	yes	yes	77
115	0～10	male	≤60	yes	Left upper lung	≤3cm	T1c	Squamous carcinoma	no	yes	73
116	＞16	male	>60	no	Left upper lung	≤3cm	T1c	adenocarcinoma	no	yes	66
117	11～16	female	>60	no	Left upper lung	≤3cm	T1c	adenocarcinoma	no	yes	76
118	0～10	male	≤60	no	Left lower lung	≤3cm	T1c	adenocarcinoma	yes	no	55
119	＞16	female	≤60	no	Right lower lung	＞3cm	T2	other	no	no	26
120	＞16	male	>60	no	Right upper lung	≤3cm	T1c	adenocarcinoma	no	yes	73
121	11～16	female	>60	no	Left upper lung	≤3cm	T2	adenocarcinoma	no	no	44
122	＞16	male	>60	no	Right lower lung	≤3cm	T1c	adenocarcinoma	no	yes	64
123	11～16	male	≤60	yes	Right upper lung	≤3cm	T2	adenocarcinoma	no	no	47
124	11～16	male	≤60	no	Left lower lung	≤3cm	T1c	Squamous carcinoma	no	yes	71
125	＞16	female	≤60	no	Left upper lung	≤3cm	T1c	adenocarcinoma	no	yes	75
126	0～10	male	>60	no	Left lower lung	＞3cm	T1c	adenocarcinoma	no	no	39
127	＞16	male	>60	no	Right upper lung	≤3cm	T1c	Squamous carcinoma	no	yes	65
128	11～16	female	>60	yes	Left upper lung	≤3cm	T1c	adenocarcinoma	no	no	40
129	11～16	male	≤60	yes	Left upper lung	≤3cm	T1c	Squamous carcinoma	no	no	39
130	＞16	male	>60	yes	Left upper lung	＞3cm	T1c	adenocarcinoma	no	yes	62
131	＞16	male	≤60	no	Left lower lung	＞3cm	T1c	adenocarcinoma	no	yes	65
132	11～16	male	>60	no	Left upper lung	＞3cm	T2	other	no	yes	71
133	0～10	female	>60	no	Right lower lung	＞3cm	T3	adenocarcinoma	yes	no	42
134	0～10	female	>60	no	Right lower lung	＞3cm	T3	adenocarcinoma	no	no	47
135	＞16	male	>60	no	Right middle lung	＞3cm	T2	adenocarcinoma	no	yes	69
136	＞16	female	>60	yes	Left lower lung	＞3cm	T2	Squamous carcinoma	no	no	41
137	11～16	male	≤60	yes	Left upper lung	≤3cm	T1c	adenocarcinoma	no	no	48
138	11～16	male	≤60	no	Right lower lung	≤3cm	T1c	adenocarcinoma	no	no	42
139	11～16	male	≤60	yes	Right middle lung	＞3cm	T3	adenocarcinoma	yes	no	39
140	11～16	female	>60	no	Left lower lung	≤3cm	T1c	Squamous carcinoma	no	yes	64
141	0～10	male	≤60	no	Left lower lung	≤3cm	T2	adenocarcinoma	no	no	46
142	11～16	male	≤60	no	Right upper lung	＞3cm	T1c	other	no	yes	76
143	11～16	male	>60	no	Right middle lung	≤3cm	T1c	adenocarcinoma	no	no	33
144	11～16	female	≤60	yes	Left upper lung	≤3cm	T1c	Squamous carcinoma	no	no	36
145	＞16	female	>60	no	Left upper lung	＞3cm	T2	adenocarcinoma	yes	no	26
146	＞16	male	>60	no	Right upper lung	≤3cm	T1c	adenocarcinoma	no	yes	64
147	0～10	female	>60	no	Right upper lung	＞3cm	T2	adenocarcinoma	no	no	41
148	0～10	male	≤60	no	Left upper lung	≤3cm	T1c	adenocarcinoma	no	yes	68
149	＞16	male	>60	no	Left upper lung	＞3cm	T1c	adenocarcinoma	no	yes	66
150	11～16	male	≤60	no	Right upper lung	≤3cm	T1c	other	yes	no	54
151	11～16	female	>60	no	Right upper lung	≤3cm	T2	adenocarcinoma	no	no	51
152	11～16	male	≤60	yes	Left upper lung	＞3cm	T3	adenocarcinoma	no	no	37
153	＞16	male	>60	yes	Right upper lung	＞3cm	T1c	Squamous carcinoma	yes	yes	70
154	＞16	male	>60	yes	Left upper lung	＞3cm	T1c	other	no	yes	66
155	＞16	male	≤60	no	Left lower lung	＞3cm	T3	adenocarcinoma	no	no	47
156	11～16	female	>60	no	Left upper lung	＞3cm	T2	adenocarcinoma	yes	yes	71
157	11～16	female	≤60	no	Right lower lung	＞3cm	T1c	adenocarcinoma	no	yes	62
158	＞16	male	>60	no	Right middle lung	＞3cm	T2	Squamous carcinoma	no	no	47
159	＞16	male	>60	no	Right middle lung	≤3cm	T1c	adenocarcinoma	no	yes	74
160	＞16	male	>60	yes	Right lower lung	≤3cm	T1c	adenocarcinoma	no	yes	66
161	＞16	female	≤60	no	Right upper lung	＞3cm	T1c	Squamous carcinoma	no	yes	71
162	11～16	male	>60	yes	Left upper lung	＞3cm	T1c	Squamous carcinoma	yes	no	55
163	＞16	male	≤60	no	Left upper lung	＞3cm	T2	adenocarcinoma	no	no	40
164	11～16	male	≤60	yes	Left lower lung	≤3cm	T2	Squamous carcinoma	no	yes	70
165	＞16	male	>60	no	Left upper lung	＞3cm	T3	adenocarcinoma	no	no	47
166	＞16	male	>60	no	Right upper lung	≤3cm	T1c	Squamous carcinoma	yes	yes	81
167	11～16	male	≤60	no	Left upper lung	＞3cm	T1c	adenocarcinoma	yes	no	47
168	＞16	male	>60	no	Left upper lung	≤3cm	T2	adenocarcinoma	no	yes	67
169	＞16	male	≤60	no	Right upper lung	≤3cm	T1c	adenocarcinoma	yes	yes	71
170	0～10	male	≤60	no	Right middle lung	≤3cm	T1c	adenocarcinoma	no	yes	73
171	11～16	male	>60	no	Left lower lung	＞3cm	T1c	adenocarcinoma	no	yes	74
172	＞16	male	>60	no	Right upper lung	＞3cm	T2	other	no	no	51
173	11～16	male	≤60	no	Left upper lung	≤3cm	T1c	adenocarcinoma	no	no	47
174	11～16	female	>60	no	Right lower lung	≤3cm	T1c	adenocarcinoma	no	yes	65
175	＞16	female	>60	no	Left lower lung	＞3cm	T2	Squamous carcinoma	no	no	46
176	11～16	male	≤60	no	Left upper lung	≤3cm	T3	Squamous carcinoma	no	yes	71
177	＞16	male	>60	yes	Right upper lung	≤3cm	T2	adenocarcinoma	no	no	42
178	＞16	female	>60	no	Right lower lung	≤3cm	T1c	adenocarcinoma	yes	yes	83
179	0～10	male	≤60	yes	Left lower lung	≤3cm	T2	adenocarcinoma	no	no	50
180	＞16	male	≤60	no	Left lower lung	＞3cm	T1c	Squamous carcinoma	yes	yes	61
181	11～16	male	>60	no	Right lower lung	≤3cm	T2	other	yes	no	55
182	0～10	male	≤60	no	Right middle lung	＞3cm	T3	adenocarcinoma	yes	no	44
183	0～10	male	≤60	yes	Right upper lung	＞3cm	T1c	adenocarcinoma	yes	yes	76
184	＞16	male	>60	no	Left upper lung	＞3cm	T3	adenocarcinoma	no	no	47
185	＞16	male	>60	yes	Left upper lung	＞3cm	T1c	other	no	yes	76
186	0～10	male	>60	no	Right upper lung	≤3cm	T3	Squamous carcinoma	no	no	43
187	0～10	male	>60	no	Left upper lung	≤3cm	T1c	adenocarcinoma	yes	no	41
188	0～10	female	>60	yes	Right lower lung	≤3cm	T2	Squamous carcinoma	no	no	48
189	0～10	male	>60	yes	Left upper lung	≤3cm	T1c	Squamous carcinoma	no	no	42
190	0～10	male	>60	no	Left upper lung	≤3cm	T1c	adenocarcinoma	no	yes	76
191	11～16	male	≤60	no	Right lower lung	≤3cm	T2	adenocarcinoma	no	yes	65
192	0～10	female	≤60	no	Left lower lung	≤3cm	T1c	adenocarcinoma	no	no	48
193	11～16	male	>60	no	Right upper lung	≤3cm	T1c	other	yes	no	46
194	11～16	female	>60	yes	Right upper lung	≤3cm	T2	Squamous carcinoma	yes	yes	74
195	0～10	female	≤60	no	Left upper lung	＞3cm	T2	other	no	no	57
196	＞16	male	≤60	no	Left upper lung	≤3cm	T1c	other	no	yes	69
197	0～10	male	≤60	no	Left lower lung	＞3cm	T1c	adenocarcinoma	no	no	46
198	11～16	female	>60	no	Left lower lung	≤3cm	T2	adenocarcinoma	no	yes	77
199	11～16	male	>60	no	Right upper lung	＞3cm	T3	adenocarcinoma	no	yes	61
200	0～10	male	>60	yes	Left upper lung	≤3cm	T1c	adenocarcinoma	yes	yes	73
201	11～16	male	>60	no	Left upper lung	≤3cm	T1c	Squamous carcinoma	no	no	49
202	＞16	male	≤60	yes	Left upper lung	≤3cm	T1c	adenocarcinoma	no	yes	69
203	＞16	female	>60	no	Left lower lung	＞3cm	T2	Squamous carcinoma	no	no	51
204	0～10	male	>60	no	Right upper lung	≤3cm	T1c	Squamous carcinoma	no	yes	69
205	＞16	female	>60	no	Left upper lung	≤3cm	T2	adenocarcinoma	no	yes	68
206	0～10	female	>60	no	Left lower lung	≤3cm	T1c	adenocarcinoma	no	no	48
207	0～10	male	≤60	no	Left lower lung	≤3cm	T1c	adenocarcinoma	no	no	46
208	11～16	female	>60	yes	Left lower lung	≤3cm	T1c	adenocarcinoma	no	yes	68
209	0～10	female	>60	yes	Left upper lung	≤3cm	T1c	adenocarcinoma	no	yes	65
210	11～16	female	>60	yes	Left upper lung	≤3cm	T3	adenocarcinoma	no	no	40
211	0～10	male	>60	no	Right middle lung	＞3cm	T2	adenocarcinoma	no	no	49
212	11～16	male	≤60	yes	Left upper lung	≤3cm	T1c	Squamous carcinoma	no	no	48
213	＞16	female	>60	no	Right lower lung	≤3cm	T2	adenocarcinoma	no	yes	65
214	11～16	male	>60	no	Left lower lung	≤3cm	T2	other	no	yes	70
215	0～10	male	>60	yes	Left upper lung	≤3cm	T1c	adenocarcinoma	no	yes	74
216	＞16	male	>60	yes	Right lower lung	≤3cm	T1c	Squamous carcinoma	no	yes	73
217	0～10	female	>60	no	Right lower lung	≤3cm	T1c	adenocarcinoma	no	no	30
218	0～10	female	>60	yes	Right lower lung	≤3cm	T1c	other	yes	no	53
219	＞16	male	>60	no	Left upper lung	≤3cm	T1c	adenocarcinoma	no	yes	68
220	0～10	female	>60	no	Right lower lung	≤3cm	T1c	adenocarcinoma	no	no	57
221	＞16	female	>60	no	Right upper lung	≤3cm	T1c	Squamous carcinoma	no	yes	65
222	0～10	male	≤60	no	Left upper lung	≤3cm	T1c	adenocarcinoma	no	no	44
223	11～16	male	>60	yes	Left upper lung	≤3cm	T1c	adenocarcinoma	yes	yes	71
224	11～16	female	≤60	no	Left upper lung	≤3cm	T1c	adenocarcinoma	no	yes	66
225	11～16	male	>60	no	Left upper lung	≤3cm	T1c	adenocarcinoma	yes	no	46
226	0～10	female	>60	no	Left upper lung	＞3cm	T3	Squamous carcinoma	no	no	42
227	11～16	male	>60	yes	Left upper lung	≤3cm	T1c	adenocarcinoma	no	no	51
228	＞16	male	>60	no	Right upper lung	＞3cm	T2	Squamous carcinoma	no	no	46
229	＞16	female	>60	no	Right lower lung	≤3cm	T1c	Squamous carcinoma	no	yes	71
230	＞16	male	>60	no	Left lower lung	＞3cm	T3	Squamous carcinoma	no	no	50
231	11～16	male	≤60	no	Left upper lung	≤3cm	T1c	other	yes	no	46
232	0～10	male	>60	no	Left upper lung	≤3cm	T1c	adenocarcinoma	no	no	42
233	11～16	female	>60	no	Left lower lung	≤3cm	T1c	adenocarcinoma	no	yes	57
234	＞16	male	>60	yes	Left lower lung	＞3cm	T3	Squamous carcinoma	yes	no	49
235	11～16	male	>60	no	Left upper lung	≤3cm	T1c	adenocarcinoma	no	yes	64
236	11～16	male	≤60	no	Left upper lung	＞3cm	T2	adenocarcinoma	no	no	46
237	＞16	male	>60	no	Left lower lung	≤3cm	T3	other	no	no	40
238	＞16	male	>60	yes	Right lower lung	≤3cm	T1c	Squamous carcinoma	no	yes	86
239	11～16	female	≤60	yes	Right upper lung	＞3cm	T1c	adenocarcinoma	yes	yes	72
240	11～16	male	>60	yes	Right middle lung	＞3cm	T2	adenocarcinoma	no	yes	70
241	＞16	female	>60	no	Left upper lung	＞3cm	T2	Squamous carcinoma	yes	no	52
242	＞16	male	≤60	yes	Right middle lung	≤3cm	T1c	adenocarcinoma	no	no	49
243	11～16	male	>60	yes	Right upper lung	≤3cm	T1c	Squamous carcinoma	no	no	46
244	11～16	male	>60	no	Right lower lung	≤3cm	T2	adenocarcinoma	yes	yes	70
245	11～16	male	≤60	no	Left lower lung	≤3cm	T3	adenocarcinoma	no	yes	69
246	0～10	male	>60	yes	Right upper lung	≤3cm	T1c	Squamous carcinoma	no	yes	61
247	11～16	male	>60	no	Right upper lung	≤3cm	T1c	Squamous carcinoma	no	yes	73
248	＞16	male	≤60	yes	Left upper lung	≤3cm	T1c	adenocarcinoma	yes	yes	64
249	＞16	female	≤60	no	Left upper lung	≤3cm	T1c	adenocarcinoma	no	yes	70
250	＞16	male	≤60	no	Left upper lung	＞3cm	T3	Squamous carcinoma	no	no	45
251	＞16	female	≤60	no	Left upper lung	＞3cm	T1c	Squamous carcinoma	yes	yes	71
252	0～10	male	≤60	no	Left upper lung	≤3cm	T1c	Squamous carcinoma	no	yes	64
253	＞16	male	>60	no	Left lower lung	＞3cm	T3	adenocarcinoma	no	no	49
254	11～16	male	≤60	no	Left lower lung	≤3cm	T1c	Squamous carcinoma	no	yes	66
255	＞16	male	>60	yes	Left lower lung	＞3cm	T3	adenocarcinoma	no	no	46
